# Supplementary material for: Occurrence of Listeria monocytogenes in Artisanal Cheeses from Poland and Its Identification by MALDI-TOF MS
Source: MDPI journal article supplement (doi:10.3390/pathogens10060632), 2021-05-21
Supplement: s1 [file s1]

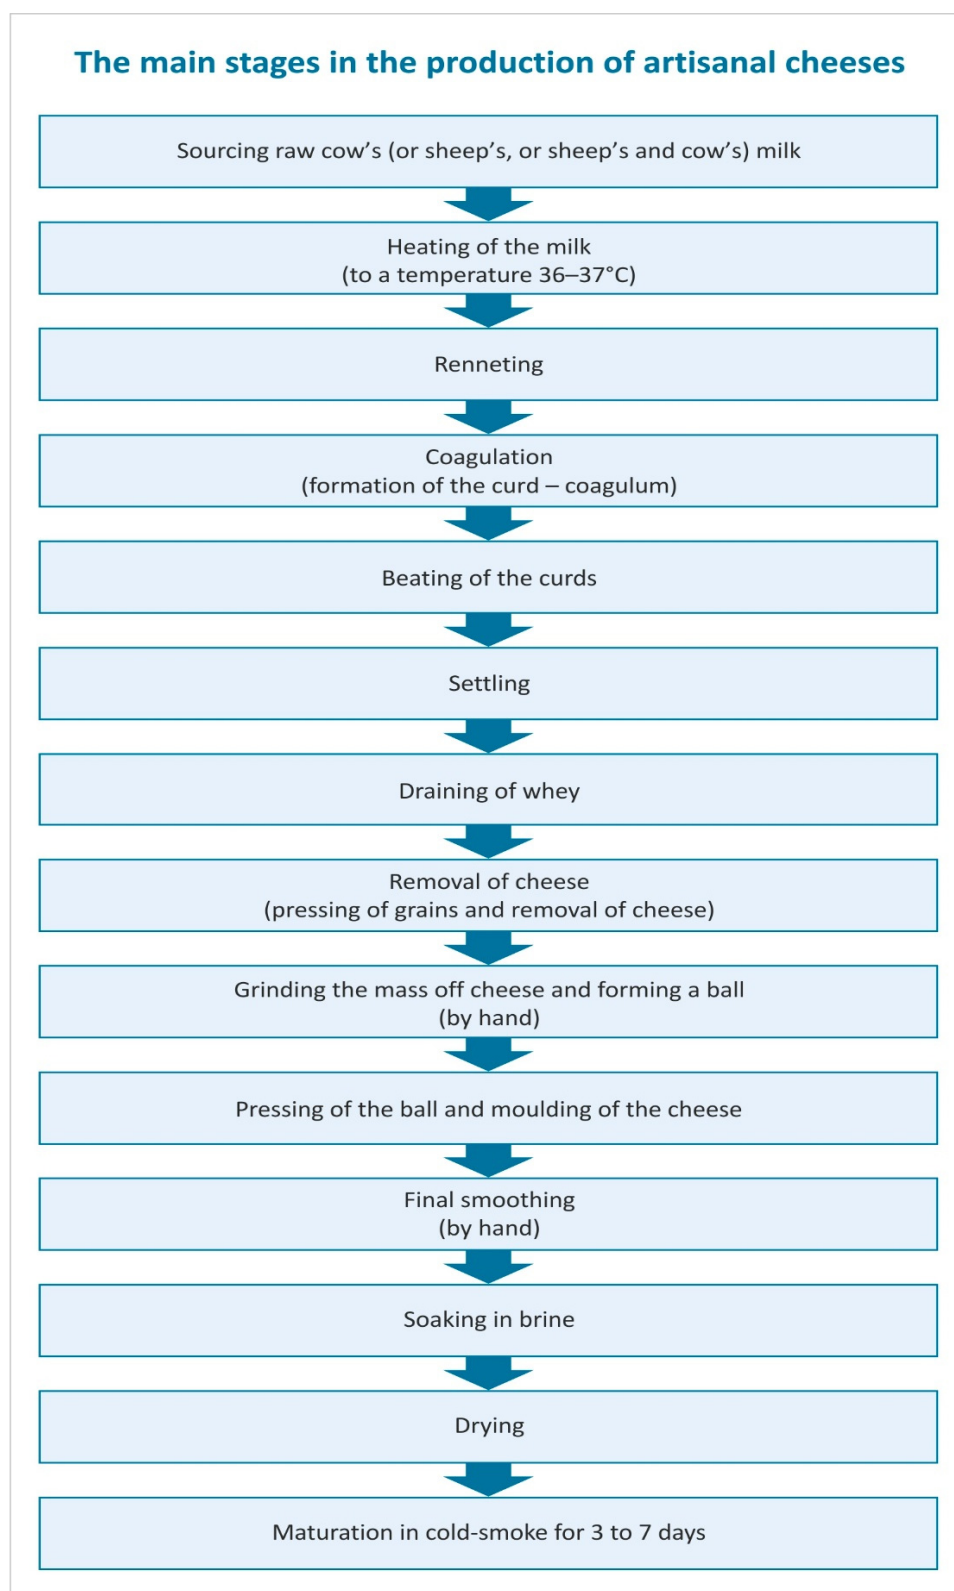

**Figure S1.** The main stages in the production of artisanal cheeses. The diagram contains the main stages of the artisanal cheeses production and it was compiled based on the information obtained from the producers.

# MALDI TOF MS identification

**Table 1.** Identification of the *L. monocytogenes* isolates by MALDI TOF MS.

| Analyte Name                     | Organism (best match)  | Score Value           | Organism (second best match) | Score Value           |
|----------------------------------|------------------------|-----------------------|------------------------------|-----------------------|
| <a href="#">T 23 2(++) (A)</a>   | Listeria monocytogenes | <a href="#">2.02</a>  | Listeria monocytogenes       | <a href="#">2.002</a> |
| <a href="#">T 10 1(+)(B)</a>     | Listeria monocytogenes | <a href="#">1.996</a> | Listeria innocua             | <a href="#">1.996</a> |
| <a href="#">T 11 1(+)(B)</a>     | Listeria monocytogenes | <a href="#">1.96</a>  | Listeria monocytogenes       | <a href="#">1.931</a> |
| <a href="#">T 13B 2(++) (A)</a>  | Listeria monocytogenes | <a href="#">2.054</a> | Listeria monocytogenes       | <a href="#">1.994</a> |
| <a href="#">T 2A 1(++) (A)</a>   | Listeria monocytogenes | <a href="#">2.007</a> | Listeria innocua             | <a href="#">1.993</a> |
| <a href="#">T 2B 2(+)(B)</a>     | Listeria monocytogenes | <a href="#">1.997</a> | Listeria monocytogenes       | <a href="#">1.991</a> |
| <a href="#">T 6A 1(++) (B)</a>   | Listeria monocytogenes | <a href="#">2.101</a> | Listeria innocua             | <a href="#">2.023</a> |
| <a href="#">T 16 3(++) (A)</a>   | Listeria monocytogenes | <a href="#">2.005</a> | Listeria monocytogenes       | <a href="#">1.951</a> |
| <a href="#">T 19 2(+)(B)</a>     | Listeria monocytogenes | <a href="#">1.986</a> | Listeria monocytogenes       | <a href="#">1.955</a> |
| <a href="#">T 4 1(++) (B)</a>    | Listeria monocytogenes | <a href="#">2.239</a> | Listeria innocua             | <a href="#">2.203</a> |
| <a href="#">T 5 1(++) (B)</a>    | Listeria monocytogenes | <a href="#">2.112</a> | Listeria monocytogenes       | <a href="#">2.063</a> |
| <a href="#">T 10 2(++) (B)</a>   | Listeria monocytogenes | <a href="#">2.182</a> | Listeria monocytogenes       | <a href="#">2.139</a> |
| <a href="#">T 10 3(++) (B)</a>   | Listeria monocytogenes | <a href="#">2.106</a> | Listeria monocytogenes       | <a href="#">2.087</a> |
| <a href="#">T 11 2(+)(B)</a>     | Listeria monocytogenes | <a href="#">1.997</a> | Listeria monocytogenes       | <a href="#">1.966</a> |
| <a href="#">T 11 3(+)(B)</a>     | Listeria monocytogenes | <a href="#">1.997</a> | Listeria monocytogenes       | <a href="#">1.994</a> |
| <a href="#">T 12 1(+)(B)</a>     | Listeria monocytogenes | <a href="#">1.921</a> | Listeria monocytogenes       | <a href="#">1.88</a>  |
| <a href="#">T 12 2(+)(B)</a>     | Listeria monocytogenes | <a href="#">1.901</a> | Listeria welshimeri          | <a href="#">1.834</a> |
| <a href="#">T 12 3(+)(B)</a>     | Listeria monocytogenes | <a href="#">1.929</a> | Listeria monocytogenes       | <a href="#">1.87</a>  |
| <a href="#">T 13A 1(++) (A)</a>  | Listeria monocytogenes | <a href="#">2.023</a> | Listeria monocytogenes       | <a href="#">2.022</a> |
| <a href="#">T 13A 2(++) (A)</a>  | Listeria monocytogenes | <a href="#">2.048</a> | Listeria monocytogenes       | <a href="#">2.023</a> |
| <a href="#">T 13A 3(++) (A)</a>  | Listeria monocytogenes | <a href="#">2.024</a> | Listeria monocytogenes       | <a href="#">1.992</a> |
| <a href="#">T 13B 1(+)(B)</a>    | Listeria monocytogenes | <a href="#">1.903</a> | Listeria monocytogenes       | <a href="#">1.862</a> |
| <a href="#">T 13B 3(++) (A)</a>  | Listeria monocytogenes | <a href="#">2.112</a> | Listeria monocytogenes       | <a href="#">2.03</a>  |
| <a href="#">T 13C 1(++) (B)</a>  | Listeria monocytogenes | <a href="#">2.065</a> | Listeria monocytogenes       | <a href="#">2.049</a> |
| <a href="#">T 13C 2(+)(B)</a>    | Listeria monocytogenes | <a href="#">1.991</a> | Listeria monocytogenes       | <a href="#">1.935</a> |
| <a href="#">T 13C 3(++) (A)</a>  | Listeria monocytogenes | <a href="#">2.021</a> | Listeria monocytogenes       | <a href="#">1.996</a> |
| <a href="#">T 14A 1(+++) (B)</a> | Listeria monocytogenes | <a href="#">2.368</a> | Listeria monocytogenes       | <a href="#">2.317</a> |
| <a href="#">T 14A 2(+++) (B)</a> | Listeria monocytogenes | <a href="#">2.306</a> | Listeria monocytogenes       | <a href="#">2.276</a> |
| <a href="#">T 14A 3(+++) (B)</a> | Listeria monocytogenes | <a href="#">2.326</a> | Listeria monocytogenes       | <a href="#">2.272</a> |
| <a href="#">T 14B 1(++) (A)</a>  | Listeria monocytogenes | <a href="#">2.013</a> | Listeria monocytogenes       | <a href="#">1.978</a> |
| <a href="#">T 14B 2(++) (A)</a>  | Listeria monocytogenes | <a href="#">2.106</a> | Listeria monocytogenes       | <a href="#">2.017</a> |
| <a href="#">T 14B 3(++) (A)</a>  | Listeria monocytogenes | <a href="#">2.106</a> | Listeria monocytogenes       | <a href="#">2.033</a> |
| <a href="#">T 15 1(+)(B)</a>     | Listeria monocytogenes | <a href="#">1.812</a> | Listeria monocytogenes       | <a href="#">1.777</a> |
| <a href="#">T 15 2(+)(B)</a>     | Listeria monocytogenes | <a href="#">1.951</a> | Listeria monocytogenes       | <a href="#">1.935</a> |
| <a href="#">T 15 3(++) (A)</a>   | Listeria monocytogenes | <a href="#">2.048</a> | Listeria monocytogenes       | <a href="#">1.979</a> |
| <a href="#">T 16 1(++) (A)</a>   | Listeria monocytogenes | <a href="#">2.036</a> | Listeria monocytogenes       | <a href="#">1.958</a> |
| <a href="#">T 16 2(+)(B)</a>     | Listeria monocytogenes | <a href="#">1.803</a> | Listeria monocytogenes       | <a href="#">1.771</a> |
| <a href="#">T 17 1(++) (B)</a>   | Listeria monocytogenes | <a href="#">2.05</a>  | Listeria innocua             | <a href="#">2.048</a> |
| <a href="#">T 17 2(++) (B)</a>   | Listeria monocytogenes | <a href="#">2.086</a> | Listeria monocytogenes       | <a href="#">2.075</a> |
| <a href="#">T 17 3(++) (B)</a>   | Listeria monocytogenes | <a href="#">2.08</a>  | Listeria innocua             | <a href="#">2.046</a> |
| <a href="#">T 18 1(++) (B)</a>   | Listeria monocytogenes | <a href="#">2.268</a> | Listeria monocytogenes       | <a href="#">2.15</a>  |
| <a href="#">T 18 2(++) (B)</a>   | Listeria monocytogenes | <a href="#">2.262</a> | Listeria monocytogenes       | <a href="#">2.131</a> |
| <a href="#">T 18 3(++) (B)</a>   | Listeria monocytogenes | <a href="#">2.249</a> | Listeria monocytogenes       | <a href="#">2.152</a> |

|                                |                        |                       |                        |                       |
|--------------------------------|------------------------|-----------------------|------------------------|-----------------------|
| <a href="#">T 19 1(+) (B)</a>  | Listeria monocytogenes | <a href="#">1.976</a> | Listeria ivanovii      | <a href="#">1.967</a> |
| <a href="#">T 19 3(+) (B)</a>  | Listeria monocytogenes | <a href="#">1.988</a> | Listeria ivanovii      | <a href="#">1.98</a>  |
| <a href="#">T 1A 1(++) (B)</a> | Listeria monocytogenes | <a href="#">2.272</a> | Listeria monocytogenes | <a href="#">2.213</a> |
| <a href="#">T 1A 2(++) (B)</a> | Listeria monocytogenes | <a href="#">2.258</a> | Listeria monocytogenes | <a href="#">2.229</a> |
| <a href="#">T 1A 3(++) (B)</a> | Listeria monocytogenes | <a href="#">2.041</a> | Listeria monocytogenes | <a href="#">2.026</a> |
| <a href="#">T 1B 1(++) (A)</a> | Listeria monocytogenes | <a href="#">2.028</a> | Listeria monocytogenes | <a href="#">2.027</a> |
| <a href="#">T 1B 2(++) (B)</a> | Listeria monocytogenes | <a href="#">2.045</a> | Listeria monocytogenes | <a href="#">2.019</a> |
| <a href="#">T 1B 3(++) (B)</a> | Listeria monocytogenes | <a href="#">2.055</a> | Listeria innocua       | <a href="#">2.05</a>  |
| <a href="#">T 1C 1(++) (B)</a> | Listeria monocytogenes | <a href="#">2.169</a> | Listeria innocua       | <a href="#">2.154</a> |
| <a href="#">T 1C 2(++) (B)</a> | Listeria monocytogenes | <a href="#">2.193</a> | Listeria innocua       | <a href="#">2.139</a> |
| <a href="#">T 1C 3(++) (B)</a> | Listeria monocytogenes | <a href="#">2.087</a> | Listeria monocytogenes | <a href="#">2.025</a> |
| <a href="#">T 20 1(+) (B)</a>  | Listeria monocytogenes | <a href="#">1.955</a> | Listeria monocytogenes | <a href="#">1.917</a> |
| <a href="#">T 20 2(+) (B)</a>  | Listeria monocytogenes | <a href="#">1.922</a> | Listeria monocytogenes | <a href="#">1.895</a> |
| <a href="#">T 20 3(+) (B)</a>  | Listeria monocytogenes | <a href="#">1.936</a> | Listeria monocytogenes | <a href="#">1.934</a> |
| <a href="#">T 21 1(++) (B)</a> | Listeria monocytogenes | <a href="#">2.116</a> | Listeria monocytogenes | <a href="#">2.074</a> |
| <a href="#">T 21 2(++) (A)</a> | Listeria monocytogenes | <a href="#">2.052</a> | Listeria monocytogenes | <a href="#">1.998</a> |
| <a href="#">T 21 3(++) (B)</a> | Listeria monocytogenes | <a href="#">2.153</a> | Listeria monocytogenes | <a href="#">2.067</a> |
| <a href="#">T 22 1(++) (B)</a> | Listeria monocytogenes | <a href="#">2.099</a> | Listeria monocytogenes | <a href="#">2.055</a> |
| <a href="#">T 22 2(++) (A)</a> | Listeria monocytogenes | <a href="#">2.101</a> | Listeria monocytogenes | <a href="#">2.037</a> |
| <a href="#">T 22 3(++) (A)</a> | Listeria monocytogenes | <a href="#">2.045</a> | Listeria monocytogenes | <a href="#">1.956</a> |
| <a href="#">T 23 1(+) (B)</a>  | Listeria monocytogenes | <a href="#">1.905</a> | Listeria monocytogenes | <a href="#">1.903</a> |
| <a href="#">T 23 3(+) (B)</a>  | Listeria monocytogenes | <a href="#">1.998</a> | Listeria welshimeri    | <a href="#">1.943</a> |
| <a href="#">T 2A 2(+) (B)</a>  | Listeria monocytogenes | <a href="#">1.915</a> | Listeria monocytogenes | <a href="#">1.89</a>  |
| <a href="#">T 2A 3(++) (B)</a> | Listeria monocytogenes | <a href="#">2.141</a> | Listeria monocytogenes | <a href="#">2.133</a> |
| <a href="#">T 2B 1(+) (B)</a>  | Listeria monocytogenes | <a href="#">1.935</a> | Listeria monocytogenes | <a href="#">1.923</a> |
| <a href="#">T 2B 3(++) (A)</a> | Listeria monocytogenes | <a href="#">2.033</a> | Listeria monocytogenes | <a href="#">1.985</a> |
| <a href="#">T 2C 1(++) (A)</a> | Listeria monocytogenes | <a href="#">2.061</a> | Listeria monocytogenes | <a href="#">2.014</a> |
| <a href="#">T 2C 2(++) (A)</a> | Listeria monocytogenes | <a href="#">2.033</a> | Listeria monocytogenes | <a href="#">1.973</a> |
| <a href="#">T 2C 3(++) (B)</a> | Listeria monocytogenes | <a href="#">2.152</a> | Listeria monocytogenes | <a href="#">2.133</a> |
| <a href="#">T 3 1(++) (B)</a>  | Listeria monocytogenes | <a href="#">2.28</a>  | Listeria innocua       | <a href="#">2.28</a>  |
| <a href="#">T 3 2(++) (B)</a>  | Listeria monocytogenes | <a href="#">2.048</a> | Listeria ivanovii      | <a href="#">2.047</a> |
| <a href="#">T 3 3(+) (B)</a>   | Listeria monocytogenes | <a href="#">1.997</a> | Listeria innocua       | <a href="#">1.961</a> |
| <a href="#">T 4 2(++) (B)</a>  | Listeria monocytogenes | <a href="#">2.278</a> | Listeria monocytogenes | <a href="#">2.247</a> |
| <a href="#">T 4 3(++) (B)</a>  | Listeria monocytogenes | <a href="#">2.29</a>  | Listeria monocytogenes | <a href="#">2.225</a> |
| <a href="#">T 5 2(++) (B)</a>  | Listeria monocytogenes | <a href="#">2.052</a> | Listeria monocytogenes | <a href="#">2.03</a>  |
| <a href="#">T 5 3(++) (B)</a>  | Listeria monocytogenes | <a href="#">2.191</a> | Listeria innocua       | <a href="#">2.107</a> |
| <a href="#">T 6A 2(++) (B)</a> | Listeria monocytogenes | <a href="#">2.134</a> | Listeria monocytogenes | <a href="#">2.091</a> |
| <a href="#">T 6A 3(++) (B)</a> | Listeria monocytogenes | <a href="#">2.137</a> | Listeria ivanovii      | <a href="#">2.105</a> |
| <a href="#">T 6B 1(+) (B)</a>  | Listeria monocytogenes | <a href="#">1.946</a> | Listeria welshimeri    | <a href="#">1.865</a> |
| <a href="#">T 6B 2(++) (A)</a> | Listeria monocytogenes | <a href="#">2.043</a> | Listeria monocytogenes | <a href="#">1.99</a>  |
| <a href="#">T 6B 3(+) (B)</a>  | Listeria monocytogenes | <a href="#">1.947</a> | Listeria innocua       | <a href="#">1.93</a>  |
| <a href="#">T 7A 1(++) (B)</a> | Listeria monocytogenes | <a href="#">2.122</a> | Listeria monocytogenes | <a href="#">2.093</a> |
| <a href="#">T 7A 2(++) (B)</a> | Listeria monocytogenes | <a href="#">2.042</a> | Listeria monocytogenes | <a href="#">2.027</a> |
| <a href="#">T 7A 3(++) (A)</a> | Listeria monocytogenes | <a href="#">2.113</a> | Listeria monocytogenes | <a href="#">2.062</a> |
| <a href="#">T 7B 1(++) (A)</a> | Listeria monocytogenes | <a href="#">2.065</a> | Listeria monocytogenes | <a href="#">2.025</a> |
| <a href="#">T 7B 2(++) (A)</a> | Listeria monocytogenes | <a href="#">2.095</a> | Listeria monocytogenes | <a href="#">2.077</a> |
| <a href="#">T 7B 3(++) (A)</a> | Listeria monocytogenes | <a href="#">2.031</a> | Listeria monocytogenes | <a href="#">2</a>     |

|                                |                        |                       |                        |                       |
|--------------------------------|------------------------|-----------------------|------------------------|-----------------------|
| <a href="#">T 8 1</a> (++) (A) | Listeria monocytogenes | <a href="#">2.027</a> | Listeria monocytogenes | <a href="#">2.009</a> |
| <a href="#">T 8 2</a> (++) (B) | Listeria monocytogenes | <a href="#">2.234</a> | Listeria monocytogenes | <a href="#">2.2</a>   |
| <a href="#">T 8 3</a> (++) (B) | Listeria monocytogenes | <a href="#">2.121</a> | Listeria monocytogenes | <a href="#">2.103</a> |
| <a href="#">T 9 1</a> (++) (B) | Listeria monocytogenes | <a href="#">2.144</a> | Listeria monocytogenes | <a href="#">2.112</a> |
| <a href="#">T 9 2</a> (++) (B) | Listeria monocytogenes | <a href="#">2.164</a> | Listeria monocytogenes | <a href="#">2.136</a> |
| <a href="#">T 9 3</a> (++) (B) | Listeria monocytogenes | <a href="#">2.127</a> | Listeria monocytogenes | <a href="#">2.12</a>  |

**Table 2.** Meaning of score values.

| Range           | Description                                                  | Symbols | Color  |
|-----------------|--------------------------------------------------------------|---------|--------|
| 2.300 ... 3.000 | highly probable species identification                       | (+++)   | green  |
| 2.000 ... 2.299 | secure genus identification, probable species identification | (++)    | green  |
| 1.700 ... 1.999 | probable genus identification                                | (+)     | yellow |
| 0.000 ... 1.699 | not reliable identification                                  | (-)     | red    |

### Molecular serotyping of *L. monocytogenes* by multiplex PCR

The Multiplex PCR for identification of the main *L. monocytogenes* serogroups was performed as described previously (Doumith et al., 2004; Wiczorek et al., 2012). The gene amplification was carried out in a thermal cycler (Biometra, Göttingen, Germany) under the following conditions: initial DNA denaturation at 94°C for 5 min, followed by 30 cycles of 94°C for 1 min, 55°C for 1 min, and 72°C for 2 min. The final cycle was performed at 55°C for 2 min and 72°C for 5 min. The protocol developed by Doumith et al. (2014) was used to determine the molecular serogroup affiliation of the *L. monocytogenes* tested. This method facilitates assigning isolates to one of four molecular serogroups (IIa, IIb, IIc, or IVb) by the presence of the genes listed in Table S3.

**Table 3.** Presence of lmo0737, lmo1118, ORF2819, ORF2810 and prs in *L. monocytogenes* molecular serogroups.

| Serogroups<br>(serotypes) | Presence of gen |         |         |         |     |
|---------------------------|-----------------|---------|---------|---------|-----|
|                           | lmo118          | lmo0737 | ORF2110 | ORF2819 | prs |
| IIa<br>(1/2a, 3a)         |                 | ▪       |         |         | ▪   |
| IIb<br>(1/2b, 3b)         |                 |         |         | ▪       | ▪   |
| IIc<br>(1/2c, 3c)         | ▪               | ▪       |         |         | ▪   |
| IVb<br>(4b,4d,4e)•        |                 |         | ▪       | ▪       | ▪   |

The reaction mixture with the constituents shown in Table S4 was prepared for the multiplex PCR, the primers for the reaction were those stated in Table S5 and the parameters of the PCR are set out in Table S6.

**Table 4.** Constituents of the reaction mixture in the multiplex PCR assay for *L. monocytogenes* molecular serogroup identification.

| Reaction mixture PCR (starting concentration) | Quantity (µl) |
|-----------------------------------------------|---------------|
| water                                         | 22            |
| bufo PCR (10x)                                | 5             |
| MgCl <sub>2</sub> (25 mM)                     | 6             |

|                     |     |
|---------------------|-----|
| dNTP (2 mM)         | 5   |
| Starters (10 mM):   |     |
| lmo1118F            | 0,5 |
| lmo1118R            | 0,5 |
| lmo0737F            | 0,5 |
| lmo0737R            | 0,5 |
| ORF2110F            | 0,5 |
| ORF2110R            | 0,5 |
| ORF2819F            | 0,5 |
| ORF2819R            | 0,5 |
| prsF                | 0,5 |
| prsR                | 0,5 |
| Polymerase (1 U/μl) | 2   |
| DNA                 | 5   |
| Total               | 50  |

**Table 5.** Primers used in the multiplex PCR assay for *L. monocytogenes* molecular serogroup identification.

| Amplified gen | Starter name | Sequence (5' → 3')     | Product size (pz) |
|---------------|--------------|------------------------|-------------------|
| lmo1118       | lmo1118F     | AGGGGTCTTAAATCCTGGAA   | 906               |
|               | lmo1118R     | CGGCTTGTTCCGCATACTTA   |                   |
| lmo0737       | lmo0737F     | AGGGCTTCAAGGACTTACCC   | 691               |
|               | lmo0737R     | ACGATTTCTGCTTGCCATTC   |                   |
| ORF2110       | ORF2110F     | AGTGGACAATTGATTGGTGAA  | 597               |
|               | ORF2110R     | CATCCATCCCTTACTTTGGAC  |                   |
| ORF2819       | ORF2819F     | AGCAAAATGCCAAAACCTCGT  | 471               |
|               | ORF2819R     | CATCACTAAAGCCTCCCATG   |                   |
| prs           | prsR         | GCTGAAGAGATTGCGAAAGAAG | 370               |
|               | prsF         | CAAAGAAACCTTGGATTGCGG  |                   |

**Table 6.** Multiplex PCR assay parameters for *L. monocytogenes* molecular serogroup identification.

| Temperature (°C) | Number of cycles | Time (min) |
|------------------|------------------|------------|
| 94,0             | 1                | 5          |
| 55,0             | 30               | 1          |
| 72,0             |                  | 2          |
| 94,0             |                  | 1          |
| 55,0             | 1                | 2          |
| 72,0             | 1                | 5          |
| 15,0             | ∞                |            |

After amplification, 5μl of 10× DNA gel loading buffer was added to each sample and the samples were applied to 1.5% agarose gel and electrophoresed for 40 min at 100V. The results were viewed with a GelDoc 2000 transilluminator (Bio-Rad, Hercules, CA, USA). The GeneRuler 100bp DNA Ladder (Thermo Fisher Scientific, Waltham, MA, USA) was used as the molecular weight standard.

## References

1. Doumith, M.; Buchrieser, C.; Glaser, P.; Jacquet, C.; Martin, P. Differentiation of the major *Listeria monocytogenes* serovars by multiplex PCR. *J. Clin. Microbiol.* **2004**, *42*, 3819–3822. doi:10.1128/JCM.42.8.3819-3822.2004

2. Wieczorek, K.; Dmowska, K.; Osek, J. Characterization and antimicrobial resistance of *Listeria monocytogenes* isolated from retail beef meat in Poland. *Foodborne Pathog. Dis.* **2012**, *9*, 681–685. doi:10.1089/fpd.2012.1137
